# Supplementary material for: Applications of the new ESPEN definition of malnutrition and SARC-F in Chinese nursing home residents
Source: PubMed Central journal article supplement (PMC6175895; doi:10.1038/s41598-018-33350-w), 2018-10-08
Supplement: 41598_2018_33350_MOESM1_ESM.pdf [file 41598_2018_33350_MOESM1_ESM.pdf]

## Title page

### Title:

Applications of the new ESPEN definition of malnutrition and SARC-F in Chinese nursing home residents

### Authors:

Ming Yang, MD<sup>1</sup>; Zhaojing Huang, BSN<sup>1</sup>; Jing Chen, BS<sup>1</sup>; Jiaojiao Jiang, PhD<sup>2</sup>; Yun Zuo, BSN<sup>3</sup>; Qiukui Hao, MD<sup>1</sup>

### Affiliations and addresses of all authors:

1. The Center of Gerontology and Geriatrics, West China Hospital, Sichuan University, No. 37 Guoxue Lane, Chengdu, Sichuan, China.
2. The Health Management Center, Shangjin Nanfu Hospital, No. 253 Shangjin Street, Chengdu, Sichuan, China.
3. The Center of Rehabilitation, West China Hospital, Sichuan University, No. 37 Guoxue Lane, Chengdu, Sichuan, China.

### Information of the corresponding author:

Ming Yang, The Center of Gerontology and Geriatrics, West China Hospital, Sichuan University, No. 37 Guoxue Lane, Chengdu, China. Phone: +86 28 8542 2326. Fax: +86 28 8542 2321. Email: [yangmier@gmail.com](mailto:yangmier@gmail.com)

Supplementary Table 1. The SARC-F scale. Adapted from Malmstrom et al.<sup>1</sup>

| Components            | Questions                                                          | SARC-F Score                                          |
|-----------------------|--------------------------------------------------------------------|-------------------------------------------------------|
| Strength              | How much difficulty do you have in lifting and carrying 10 pounds? | None=0<br>Some =1<br>A lot or unable = 2              |
| Assistance in walking | How much difficulty do you have walking across a room?             | None=0<br>Some =1<br>A lot, use aids, or unable = 2   |
| Rise from a chair     | How much difficulty do you have transferring from a chair or bed?  | None=0<br>Some =1<br>A lot or unable without help = 2 |
| Climb stairs          | How much difficulty do you have climbing a flight of 10 stairs?    | None=0<br>Some =1<br>A lot or unable = 2              |
| Falls                 | How many times have you fallen in the past year?                   | None=0<br>1-3 falls =1<br>4 or more falls = 2         |

## References

1. Malmstrom TK, Morley JE. SARC-F: a simple questionnaire to rapidly diagnose sarcopenia. J Am Med Dir Assoc 2013;14(8):531-2.

**Supplementary Table 2. Baseline characteristics of the study population according to malnutrition and sarcopenia separately**

| Characteristic                               | SARC-F                     |                    |        | ESPEN definition             |                     |        |
|----------------------------------------------|----------------------------|--------------------|--------|------------------------------|---------------------|--------|
|                                              | Without sarcopenia (n=198) | Sarcopenia (n=131) | P      | Without malnutrition (n=253) | malnutrition (n=76) | P      |
| Age (years) <sup>*</sup>                     | 84.0 (2.0)                 | 85.0 (3.0)         | 0.016  | 84.0 (3.0)                   | 85.0 (3.0)          | 0.013  |
| Women (%)                                    | 126 (63.6)                 | 98 (74.8)          | 0.033  | 169 (66.8)                   | 55 (72.4)           | 0.361  |
| Current smokers (%)                          | 7 (3.5)                    | 3 (2.3)            | 0.745  | 7 (2.8)                      | 3 (3.9)             | 0.599  |
| Current alcohol drinkers (%)                 | 1.4 (7.1)                  | 9 (6.9)            | 0.944  | 20 (7.9)                     | 3 (3.9)             | 0.235  |
| Comorbidities (%)                            |                            |                    |        |                              |                     |        |
| Hypertension                                 | 56 (28.3)                  | 43 (32.8)          | 0.379  | 85 (33.6)                    | 14 (18.4)           | 0.011  |
| Ischemic heart disease                       | 14 (7.1)                   | 19 (14.5)          | 0.028  | 27 (10.7)                    | 6 (7.9)             | 0.480  |
| CHF                                          | 63 (31.8)                  | 49 (37.4)          | 0.295  | 86 (34.0)                    | 26 (34.2)           | 0.972  |
| COPD                                         | 21 (10.6)                  | 22 (16.8)          | 0.103  | 36 (14.2)                    | 7 (9.2)             | 0.255  |
| Diabetes                                     | 22 (11.1)                  | 11 (8.4)           | 0.422  | 28 (11.1)                    | 5 (6.6)             | 0.253  |
| Stroke                                       | 39 (19.7)                  | 17 (13.0)          | 0.112  | 46 (18.2)                    | 10 (13.2)           | 0.307  |
| Cancer                                       | 16 (8.1)                   | 10 (7.6)           | 0.883  | 23 (9.1)                     | 3 (3.9)             | 0.145  |
| Osteoarthritis                               | 108 (54.5)                 | 83 (63.4)          | 0.113  | 147 (58.1)                   | 44 (57.9)           | 0.974  |
| Parkinson's disease                          | 10 (5.1)                   | 21 (16.0)          | 0.001  | 23 (9.1)                     | 8 (10.5)            | 0.707  |
| Cognitive impairment                         | 48 (24.2)                  | 23 (17.6)          | 0.149  | 49 (19.4)                    | 22 (28.9)           | 0.075  |
| Depression                                   | 36 (18.2)                  | 32 (24.4)          | 0.171  | 54 (21.3)                    | 14 (18.4)           | 0.581  |
| Nutritional supplements                      | 28 (14.1)                  | 23 (17.6)          | 0.402  | 39 (15.4)                    | 12 (15.8)           | 0.937  |
| SARC-F score <sup>*</sup>                    | 2.0 (2.0)                  | 4.0 (1.0)          | <0.001 | 3.0 (2.0)                    | 3.5 (3.0)           | 0.039  |
| MNA-SF score <sup>*</sup>                    | 13.0 (2.5)                 | 11.0 (3.0)         | 0.025  | 13.0 (3.0)                   | 10.0 (2.5)          | <0.001 |
| BMI (women, kg/m <sup>2</sup> ) <sup>*</sup> | 24.2 (3.9)                 | 23.9 (4.3)         | 0.733  | 25.1 (3.5)                   | 22.0 (2.5)          | <0.001 |
| BMI (men, kg/m <sup>2</sup> ) <sup>*</sup>   | 24.1 (4.6)                 | 23.0 (4.9)         | 0.092  | 24.7 (4.0)                   | 20.0 (1.7)          | <0.001 |

|                    |             |             |       |             |             |        |
|--------------------|-------------|-------------|-------|-------------|-------------|--------|
| CC (women, cm)*    | 32.0 (4.0)  | 32.0 (3.0)  | 0.047 | 32.0 (3.0)  | 30.0 (3.0)  | <0.001 |
| CC (men, cm)*      | 33.0 (4.0)  | 32.0 (4.0)  | 0.005 | 33.0 (3.0)  | 30.0 (4.0)  | <0.001 |
| WC (women, cm)*    | 85.0 (12.0) | 85.0 (13.0) | 0.840 | 87.0 (10.0) | 76.0 (10.0) | <0.001 |
| WC (men, cm)*      | 86.0 (12.0) | 82.0 (17.5) | 0.210 | 87.0 (12.5) | 75.0 (10.0) | <0.001 |
| ADL disability (%) | 74 (37.4)   | 64 (48.9)   | 0.884 | 99 (39.1)   | 39 (51.3)   | 0.059  |

\* Data are presented as median (IQR).

ADL: activities of daily living; BMI: body mass index; CC: calf circumference; CHF: chronic heart failure; COPD: chronic obstructive pulmonary disease; IQR: interquartile range; MNA-SF: Mini Nutritional Assessment Short-Form; MN+/SA+: malnutrition combined with sarcopenia; MN+/SA-: malnutrition without sarcopenia; MN-/SA+: normal nutrition with sarcopenia; MN-/SA-: normal nutrition without sarcopenia; WC: waist circumference.
